# Supplementary material for: Transdiagnostic Symptoms in Children with Neurodevelopmental Disabilities and Perceived Parent-Child Relationship Quality: A Pilot Study
Source: Springer Nature journal article supplement (doi:10.1007/s10826-023-02570-8), 2023-04-27
Supplement: MOESM1 [file 25293270]

**Supplemental Fig. 1**. Distribution of diagnoses across the sample in the present study. *a* = autism, *b* = learning disability, *c* = ADHD, *d* = cerebral palsy.

*ab* = 2

*bc* = 3

*cd* = 1

*ad* = 1

*ac* = 17

*abc* = 9
