# Supplementary material for: Transdiagnostic Symptoms in Children with Neurodevelopmental Disabilities and Perceived Parent-Child Relationship Quality: A Pilot Study
Source: Springer Nature journal article supplement (doi:10.1007/s10826-023-02570-8), 2023-04-27
Supplement: MOESM2 [file 25293270]

**Supplemental Table 1**

Bivariate correlations between child characteristics and PAI scores in ASD-only participants

|  | *M* | *SD* | Range | 1 | 2 | 3 | 4 | 5 | 6 |
| --- | --- | --- | --- | --- | --- | --- | --- | --- | --- |
| 1. PAI Total Score | 46.96 | 6.62 | 34-58 |  |  |  |  |  |  |
| 2. IQ Groups | 104.87 | 17.11 | 79-134 | -.10 |  |  |  |  |  |
| 3. SCI | 72.61 | 6.56 | 60-84 | -.48* | -.21 |  |  |  |  |
| 4. RRB | 75.04 | 7.97 | 59-90 | -.10 | -.19 | .47* |  |  |  |
| 5. Internalizing Problems | 63.61 | 13.22 | 39-94 | -.29 | .08 | .70** | .54** |  |  |
| 6. Externalizing Problems | 63.04 | 13.14 | 40-95 | -.27 | -.08 | .46* | .55** | .48* |  |
| 7. Behavioural Symptoms | 71.35 | 10.39 | 52-89 | -.32 | -.17 | .61** | .65** | .69** | .85** |

* *p* < .05; ** *p* < .01.

**Supplemental Table 2**

Regressions between child characteristics and PAI scores in ASD-only participants

| Regression | Predictors | *B* | *SE* | *t* | *sr2* | *Adjusted R2* |
| --- | --- | --- | --- | --- | --- | --- |
| Model 1 | SCI | -.54 | .56 | -.96 | .05 | .14 |
| IQ | -.24 | 2.54 | -.99 | .05 |  |
| Interaction | .04 | .43 | .07 | .0003 |  |
| Model 2 | RRB | -.27 | .36 | -.63 | .02 | -.09 |
| IQ | -.17 | 2.41 | -.73 | .03 |  |
| Interaction | .09 | .28 | .21 | .002 |  |
| Model 3 | Internalizing Problems | -.38 | .26 | -.74 | .03 | -.08 |
| IQ | -.06 | 3.02 | -.19 | .002 |  |
| Interaction | .21 | .26 | .39 | .008 |  |
| Model 4 | Externalizing Problems | -.42 | .19 | -1.13 | .06 | -.02 |
| IQ | -.17 | 2.42 | -.71 | .03 |  |
| Interaction | .15 | .19 | .38 | .008 |  |
| Model 5 | Behavioural Dysregulation | -.43 | .27 | -1.02 | .05 | .01 |
| IQ | -.20 | 2.82 | -.74 | .03 |  |
| Interaction | .09 | .25 | .20 | .002 |  |

*Note.* The dependent variable for all regressions is total PAI scores.
